# Supplementary material for: Iron overload induces ROS-mediated neural stem/progenitor cells apoptosis via mTOR pathway
Source: Research Square preprint supplement (doi:10.21203/rs.3.rs-8247028/v1), 2025-12-12
Supplement: Supplementary file 1 [file c5471aed7cd695f8c52c1dec.docx]

**Supplementary materials**


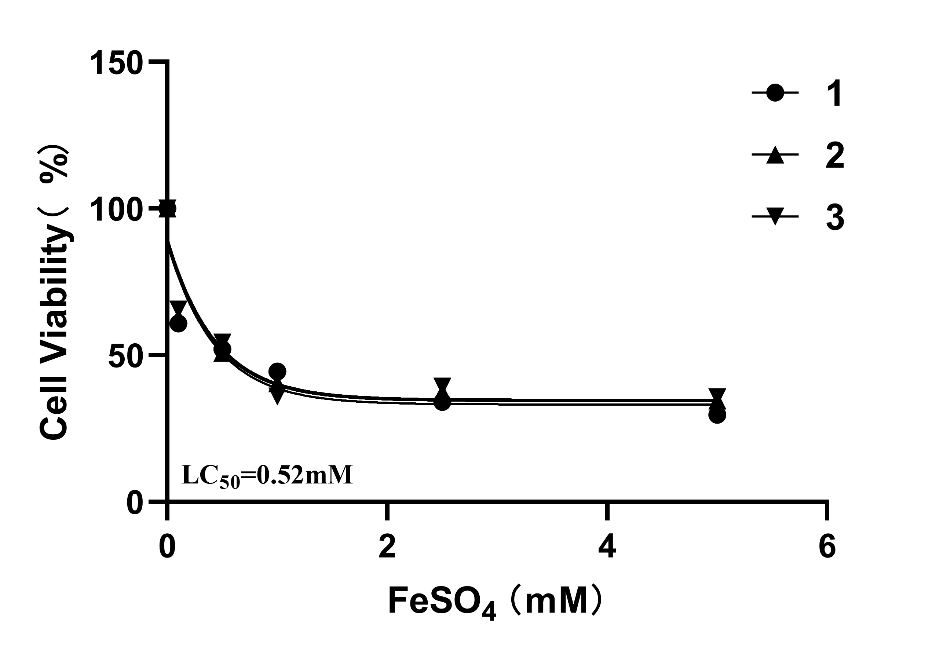


Fig. S1 CCK8 assay of NSPCs exposed to FeSO4. CCK8 assay showed the inhibition of NSPCs viability by high concentration of iron (0 -5 mM). The LD50 of iron's toxic effect on NSPCs is 0.52 mM. Similar results were observed in at least three independent experiments.
